# Supplementary material for: A highly selective gas sensor based on the WO3/WS2 van der Waals heterojunction for the 2-chloroethyl ethyl sulfide (2-CEES) sensing application
Source: Royal Society of Chemistry journal article supplement (doi:10.1039/d1tc04678k), 2021-01-01
Supplement: d1tc04678k1.pdf [file d1tc04678k1.pdf]

**Highly Selective Gas Sensor Based on WO<sub>3</sub>/WS<sub>2</sub> Van Der Waals Heterojunction for 2-chloroethyl ethyl sulfide (2-CEES) Sensing Application**

Yong Fan<sup>a</sup>, Kun Li<sup>b</sup>, Xingang Ren<sup>\*,a</sup>, Wenlong Yan<sup>a</sup>, Cuijie Zhu<sup>a</sup>, Yuanfang Zhao<sup>a</sup>, Wei Zeng<sup>a</sup>, Zhiliang Chen<sup>a</sup> and Siliang Wang<sup>\*,a</sup>

<sup>a</sup>Information Materials and Intelligent Sensing Laboratory of Anhui Province, School of Integrated Circuits, Anhui University, No. 111 Jiulong Road, Hefei 230601, Anhui Province, People's Republic of China

<sup>b</sup>Suzhou R & D center of East China Institute of optoelectronic integrated devices, No. 89 Longshan Road, Suzhou 215163, Jiangsu Province, People's Republic of China

\*Correspondence to: [xgren@ahu.edu.cn](mailto:xgren@ahu.edu.cn); [sliang\\_wang@163.com](mailto:sliang_wang@163.com)

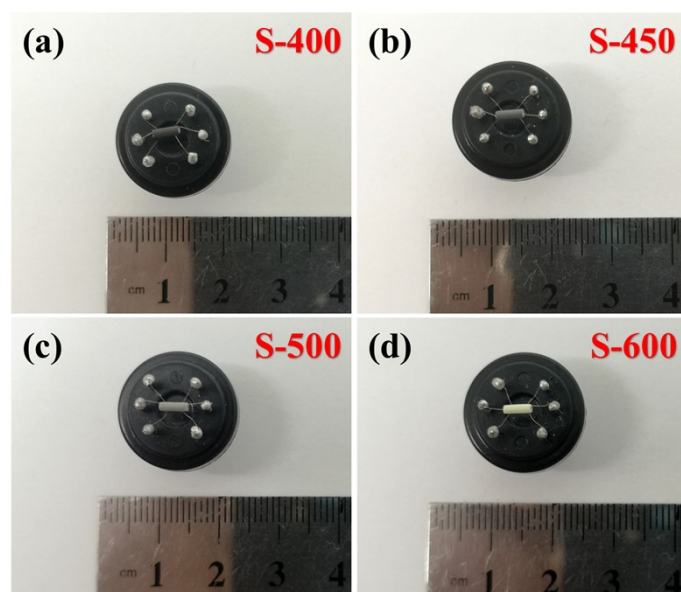

Figure S1. The digital photographs of the four sensors based on (a) S-400, (b) S-450, (c) S-500 and (d) S-600.

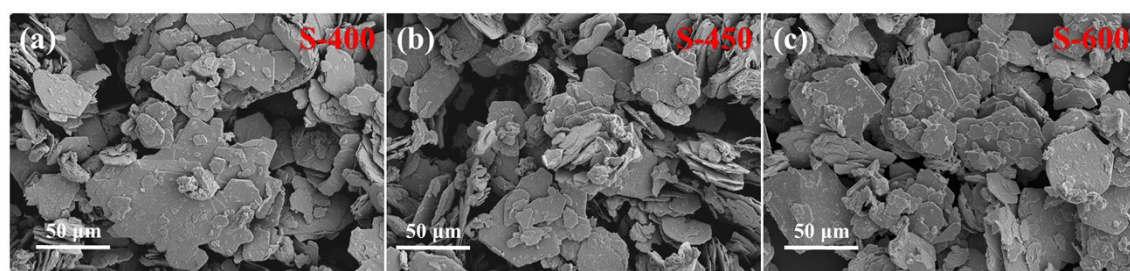

Figure S2. The SEM images of (a) S-400, (b) S-450 and (c) S-600.

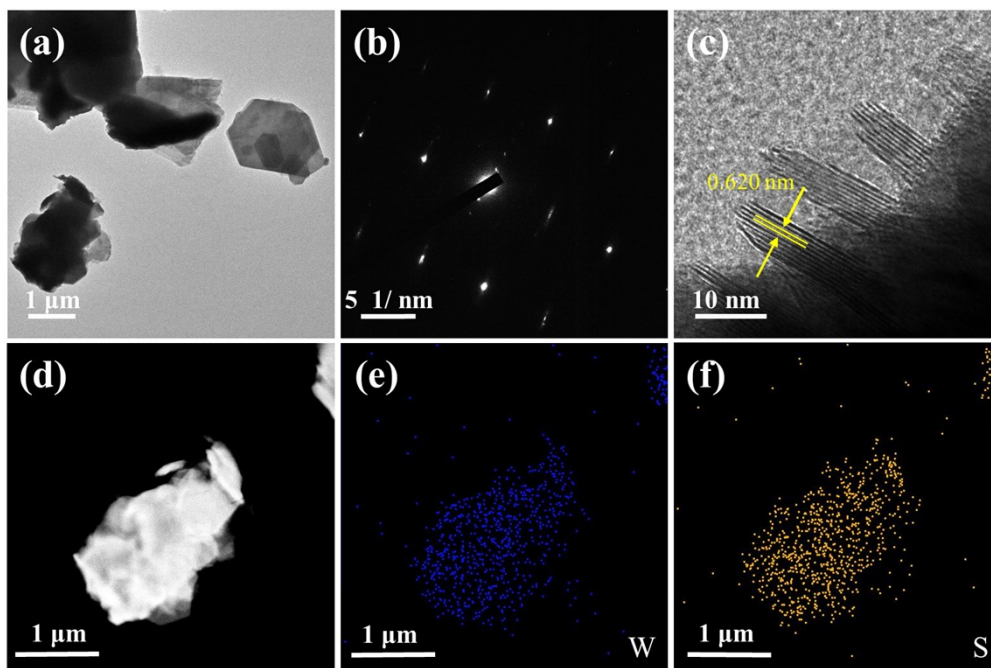

Figure S3. The characterization of WS<sub>2</sub> raw material. (a) TEM image, (b) SAED, (c) HRTEM image and (d-f) STEM image and corresponding elemental mapping images of the WS<sub>2</sub> raw material.

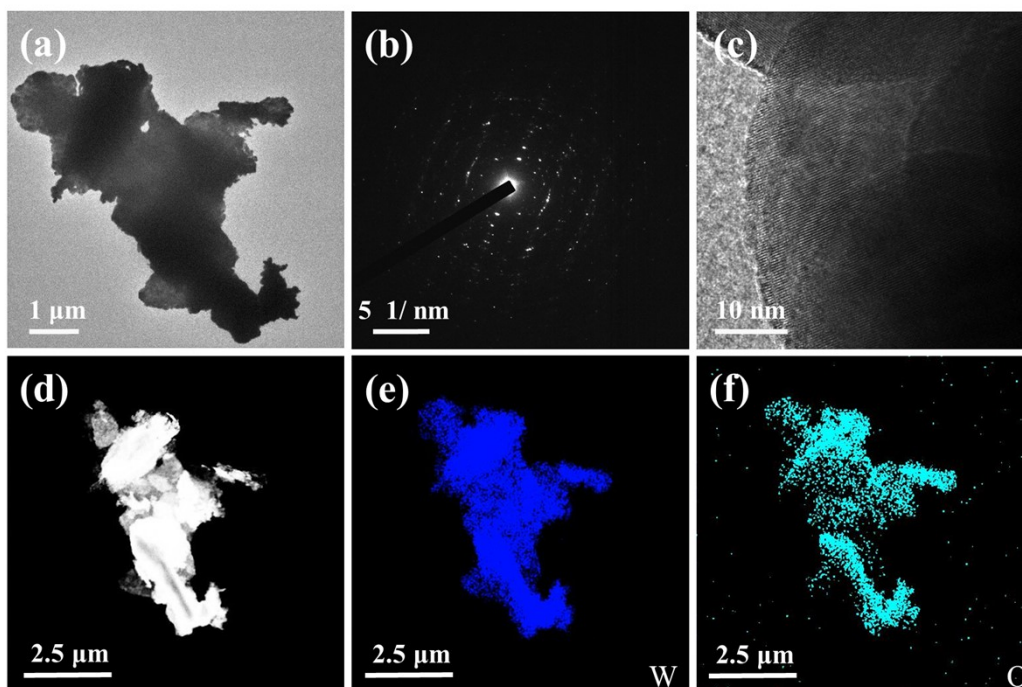

Figure S4. The characterization of S-600. (a) TEM image, (b) SAED, (c) HRTEM image and (d-f) STEM image and corresponding elemental mapping images of S-600.

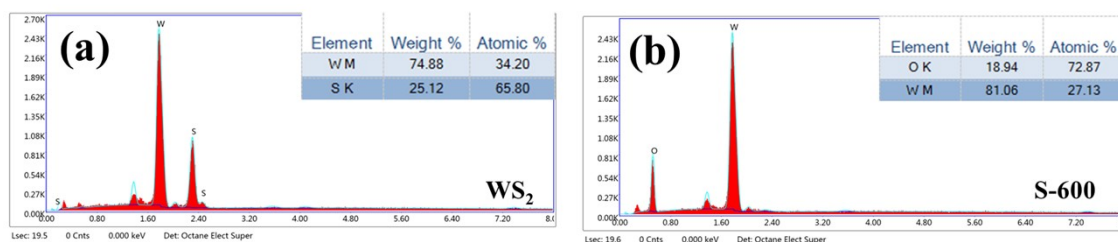

Figure S5. The EDX spectrum of (a) WS<sub>2</sub> raw material and (b) S-600.

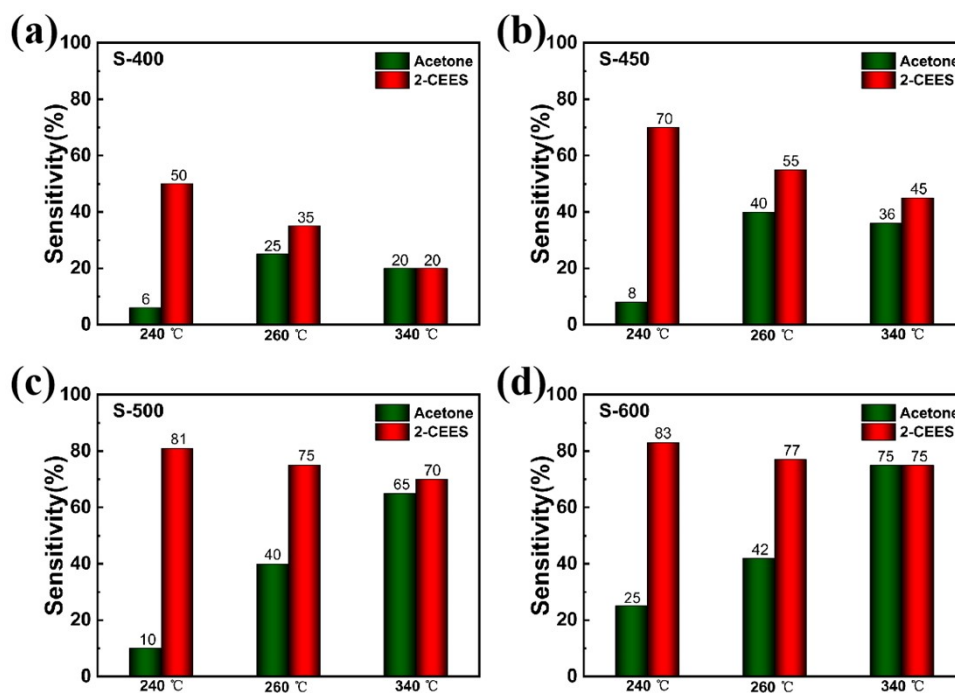

Figure S6. The response of sensors based on (a) S-400, (b) S-450, (c) S-500 and (d) S-600 to 5.7 ppm 2-CEES and acetone at different operating temperatures.

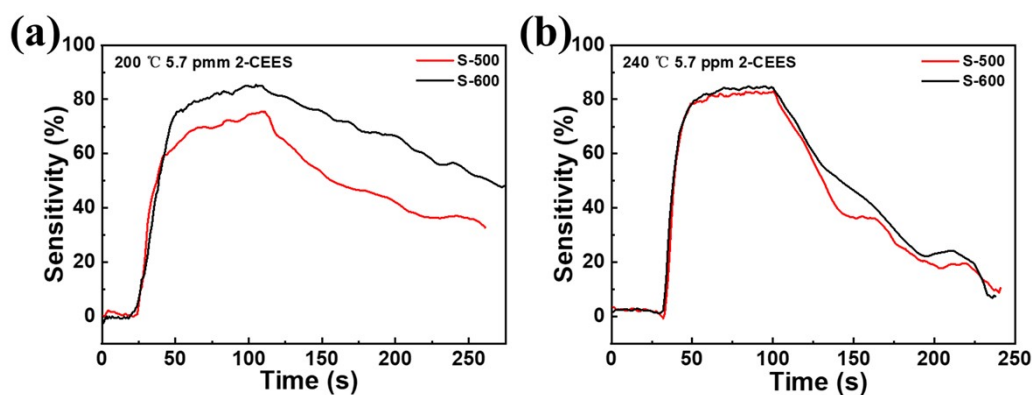

Figure S7. The dynamic transient response curves of sensors based on S-500 and S-600 to 5.7 ppm 2-CEES at operating temperature of (a) 200 °C and (b) 240 °C.

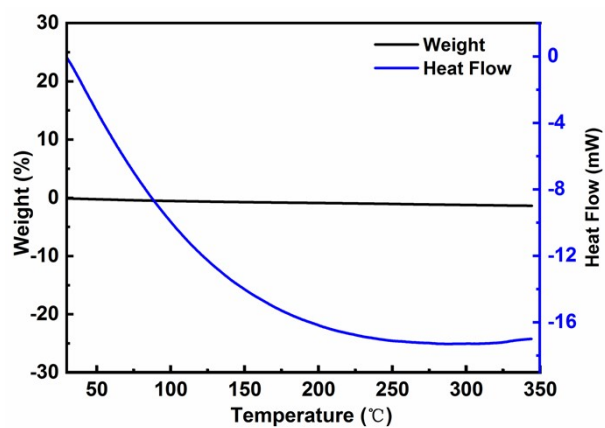

Figure S8. The thermal behavior of the prepared synthesized material (S-500).

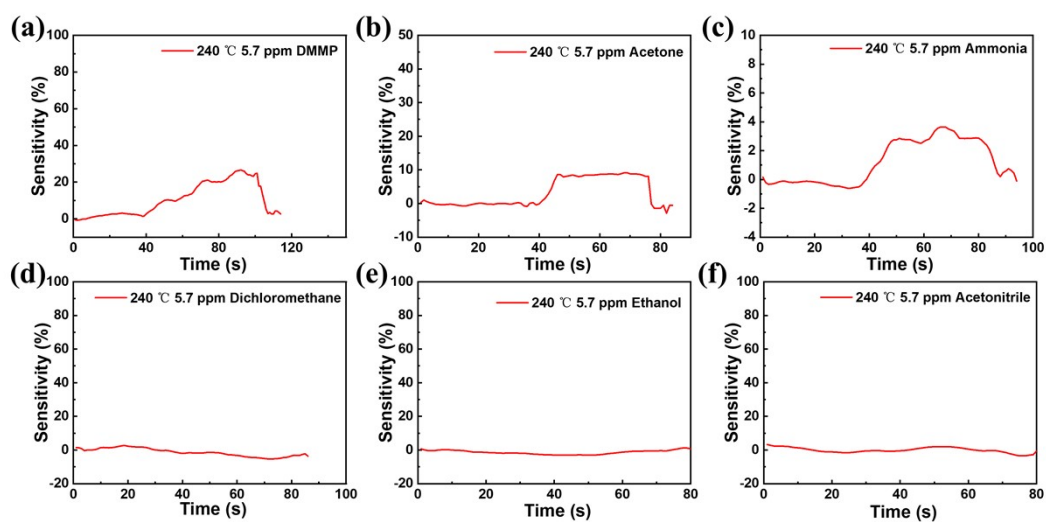

Figure S9. The dynamic transient response curve of sensor to (a) DMMP, (b) acetone, (c) ammonia, (d) dichloromethane, (e) ethanol, and (f) acetonitrile with concentration of 5.7 ppm.
